# Supplementary material for: Elucidating the Foundations of Statistical Inference with 2 x 2 Tables
Source: PubMed Central journal article supplement (PMC4388855; doi:10.1371/journal.pone.0121263), 2015-04-07
Supplement: pone.0121263.s001.pdf [file pone.0121263.s001.pdf]

## Appendix A. Definitions of the Law of Likelihood, and estimated, profile, and modified profile likelihoods

**Law of Likelihood:** If hypothesis  $A$  implies that the probability that a random variable  $X$  takes the value  $x$  is  $p_A(x)$ , while hypothesis  $B$  implies that the probability is  $p_B(x)$ , then the observation  $X = x$  is evidence supporting  $A$  over  $B$  if and only if  $p_A(x) > p_B(x)$ , and the likelihood ratio,  $p_A(x)/p_B(x)$ , measures the strength of that evidence [1].

**Estimated likelihood:** Given the joint likelihood  $L(\psi, \lambda)$ , the estimated likelihood of  $\psi$  is:

$$L_E(\psi) = L(\psi, \hat{\lambda}),$$

where  $\hat{\lambda}$  is the maximum likelihood estimates of  $\lambda$ . The estimated likelihood is also called a ‘pseudo-likelihood’ in [2].

**Profile likelihood:** Given the joint likelihood  $L(\psi, \lambda)$ , the profile likelihood of  $\psi$  is:

$$L_P(\psi) = \sup_{\lambda} L(\psi, \lambda),$$

where the supremum is with respect to  $\lambda$  and is performed at each value of  $\psi$ , which is held fixed.

**Modified profile likelihood:** Given the joint likelihood  $L(\psi, \lambda)$  and the profile likelihood  $L_P(\psi)$ , the modified profile likelihood of  $\psi$  is:

$$L_M(\psi) = L_P(\psi) \left| j_{\lambda\lambda}(\psi, \hat{\lambda}_{\psi}) \right|^{-\frac{1}{2}} \left| \frac{\partial \hat{\lambda}_{\psi}}{\partial \hat{\lambda}} \right|^{-1} = L_P(\psi) \frac{\left| j_{\lambda\lambda}(\psi, \hat{\lambda}_{\psi}) \right|^{\frac{1}{2}}}{\left| l_{\lambda; \hat{\lambda}}(\psi, \hat{\lambda}_{\psi}) \right|},$$

where  $\hat{\lambda}_{\psi}$  are the maximum likelihood estimates of  $\lambda$  at a fixed value of  $\psi$ ,

$\hat{\lambda}$  are the maximum likelihood estimates of  $\lambda$ ,

$\hat{\psi}$  is the maximum likelihood estimate of  $\psi$ ,

$$j_{\lambda\lambda}(\psi, \hat{\lambda}_{\psi}) = -\frac{\partial^2}{\partial \lambda^2} l(\psi, \hat{\lambda}_{\psi}; \hat{\psi}, \hat{\lambda}) \Big|_{\lambda=\hat{\lambda}_{\psi}} \quad \text{and}$$

$$l_{\lambda; \hat{\lambda}}(\psi, \hat{\lambda}_{\psi}) = \frac{\partial^2}{\partial \lambda \hat{\lambda}} l(\psi, \hat{\lambda}_{\psi}; \hat{\psi}, \hat{\lambda}) \Big|_{\lambda=\hat{\lambda}_{\psi}}.$$

## References

1. Hacking I. Logic of statistical inference. New York: Cambridge University Press; 1965.
2. Gong G, Samaniego FJ. Pseudo maximum likelihood estimation: theory and applications. The Annals of Statistics. 1981;9(4):861–869.
